# Supplementary material
Source: PubMed Central journal article supplement (PMC9521857)
Supplement: 134_2022_6891_MOESM1_ESM.pdf [file 134_2022_6891_MOESM1_ESM.pdf]

## Electronic Supplementary Material

### Corticosteroids in H1N1, non-viral, and COVID-19 ARDS: a nationwide cohort study

#### *Intensive Care Medicine*

Kyoung-Eun Kwon<sup>1</sup>, Sun-Young Jung<sup>1,2</sup>, Moon Seong Baek<sup>3</sup> and Won-Young Kim<sup>3,4\*</sup>

<sup>1</sup> College of Pharmacy, Chung-Ang University, 84 Heukseok-ro, Dongjak-gu, Seoul 06974, Korea

<sup>2</sup> Department of Global Innovative Drugs, Chung-Ang University, 84 Heukseok-ro, Dongjak-gu, Seoul 06974, Korea

<sup>3</sup> Division of Pulmonary and Critical Care Medicine, Department of Internal Medicine, Chung-Ang University Hospital, Chung-Ang University College of Medicine, 102 Heukseok-ro, Dongjak-gu, Seoul 06973, Korea

<sup>4</sup> Biomedical Research Institute, Chung-Ang University Hospital, 102 Heukseok-ro, Dongjak-gu, Seoul 06973, Korea

\*Correspondence: wykim81@cau.ac.kr

#### **eMethods**

#### **eResults**

#### **eDiscussion**

#### **eReferences**

#### **eAppendix 1** Types and codes for intravenous corticosteroids

#### **eAppendix 2** Comorbidities based on the Charlson Comorbidity Index

#### **eAppendix 3** Hospital types defined by Korean Health Law according to the number of beds and specialties

#### **eAppendix 4** ICD-10-based classification of organ dysfunction

#### **eTable 1** Baseline patient characteristics in H1N1, non-viral, or COVID-19 ARDS

#### **eTable 2** Primary and secondary outcomes

#### **eFig. 1** Patient inclusion flowchart in the nationwide cohort study of H1N1, non-viral, and COVID-19 ARDS

**eFig. 2** Survival from hospital admission to day 180

**eFig. 3** Associations between corticosteroid use and **(A)** 30- and **(B)** 180-day mortality according to the duration of use (<6 days vs  $\geq$ 6 days) in H1N1, non-viral, or COVID-19 ARDS

**eFig. 4** Associations between corticosteroid use and **(A)** 30- and **(B)** 180-day mortality according to subgroup in H1N1 ARDS

**eFig. 5** Associations between corticosteroid use and **(A)** 30- and **(B)** 180-day mortality according to subgroup in non-viral ARDS

**eFig. 6** Associations between corticosteroid use and **(A)** 30- and **(B)** 180-day mortality according to subgroup in COVID-19 ARDS

## **eMethods**

### *Study design and data source*

This nationwide population-based study retrieved data from the Korean National Health Insurance Service (NHIS) database to construct (1) 2009 influenza A (H1N1) acute respiratory distress syndrome (ARDS) cohort (May 2009–April 2010), (2) non-viral ARDS cohort (January 2015–April 2019), and (3) coronavirus disease 2019 (COVID-19) ARDS cohort (January–December 2020). The study protocol for analysis of de-identified patient data was exempted from review by the Institutional Review Board of Chung-Ang University (1041078-202007-HR-180-01).

The NHIS database consists of reimbursement claims from all citizens who reside in Korea except for medical aid beneficiaries and healthcare beneficiaries for veterans (over 97% of the population in 2018) [1]. The data provide detailed information including demographics, diagnoses, prescriptions, procedures, discharge outcome, and date of death. The diagnostic codes were based on the International Classification of Diseases, 10th Revision (ICD-10). All prescribed and dispensed drugs were identified using Anatomical Therapeutic Chemical codes and the Korean Health Insurance Review and Assessment Service charge codes. Data were extracted by an independent technician at the NHIS center.

### *Study population*

For H1N1 cases, patients with the ICD-10 codes for influenza (J09, J10, or J11) from May 2009 to April 2010 were included. The study period included the peak of the pandemic; thus, almost all influenza cases were presumed to be caused by the H1N1 strain [2]. Patients with non-viral ARDS were identified using the ICD-10 code for ARDS (J80) while excluding the codes for influenza (J09–J11) and viral pneumonia (J12) from January 2015 to April 2019. COVID-19 cases were identified using the ICD-10 codes, which were given only for confirmed COVID-19 cases based on positive nasopharyngeal swab specimens tested using real-time reverse transcription-polymerase chain reaction assays [3], from January to December 2020. For patients with multiple admissions for ARDS treatment, only the first admission was included. Patients were excluded if they were <18 years, died or were discharged within the

first two days of hospitalization, did not receive mechanical ventilation, were pregnant or had a related condition, were receiving palliative care, or experienced cardiac arrest. All patients were followed until death or 180 days following the day of hospital admission.

### *Corticosteroids*

Corticosteroid use was defined as at least one dose for intravenous (IV) dexamethasone, hydrocortisone, or methylprednisolone during the hospitalization. If two or three different corticosteroids were used, the one with higher potency was selected for grouping. All doses were converted to methylprednisolone equivalents [4], and the cumulative dose and total duration of use were calculated. The detailed types and codes for IV corticosteroids are shown in eAppendix 1.

### *Data collection, definitions, and outcomes*

Baseline patient characteristics included age, sex, Charlson comorbidities [5] defined on the basis of claim codes within one year before admission (eAppendix 2), immunosuppression (malignancies, human immunodeficiency virus infection, organ transplantation, or administration of immunosuppressive therapy), and previous steroid use (oral or IV for  $\geq 30$  days during the previous year). The hospital type was determined according to the number of beds and specialties (eAppendix 3), and the type of organ dysfunction was identified using ICD-10 codes (eAppendix 4). Vasopressor use was defined as the administration of norepinephrine, epinephrine, vasopressin, dopamine, or dobutamine during the hospitalization. Procedure codes were used to retrieve cases that involved renal replacement therapy and extracorporeal membrane oxygenation (ECMO).

The primary outcomes were 30- and 180-day mortality. The secondary outcomes included vasopressor days, ventilator days, intensive care unit (ICU) and hospital lengths of stay, and tracheostomy.

### *Statistical analysis*

Data are presented as the mean (standard deviation) or median (interquartile range) for continuous variables and as numbers (percentages) for categorical variables. Continuous variables were compared using one-way ANOVA or the Kruskal-Wallis test, as appropriate, whereas categorical variables were compared using the chi-square test or Fisher's exact test, as appropriate.

In logistic regression analyses, previous steroid use showed a high collinearity with immunosuppression and was excluded in the final model. Similarly, vasopressor use and renal replacement therapy revealed high collinearity with organ dysfunction and were excluded. The cutoff values for dosage of and duration of treatment with corticosteroids were based on Youden's index [6]. Randomized trials have shown a significant survival benefit of long-term corticosteroids in COVID-19 and non-COVID-19 ARDS [7, 8]. Thus, as a sensitivity analysis, the associations between corticosteroid use and mortality with stratification according to the duration of use (<6 days vs  $\geq$ 6 days) were also analyzed.

No missing values were found in the dataset. The results of the secondary analyses should be considered hypothesis-generating due to the potential for type I error caused by multiple comparisons. All statistical analyses were performed using SAS software (version 9.4; SAS Institute, Cary, NC, USA). All tests were two-tailed, and differences were considered statistically significant at  $p < 0.05$ .

## **eResults**

### *Clinical outcomes*

Patients with non-viral ARDS demonstrated significantly higher 30- (44.2% vs 29.4% vs 28.0%;  $p < 0.001$ ) and 180-day mortality (67.2% vs 52.6% vs 49.2%;  $p < 0.001$ ) than those with H1N1 or COVID-19 ARDS (eTable 2). The patients also demonstrated significantly more vasopressor and ventilator days, longer ICU and hospital lengths of stay, and a higher tracheostomy rate. The survival curves for the three cohorts are shown in eFig. 2.

### *Associations of the dosage of, duration of treatment with, and type of steroids with mortality*

In H1N1 ARDS, a cumulative steroid dose  $\geq 250$  mg, steroid use for  $\geq 3$  days, and dexamethasone use were significantly associated with decreased 30-day mortality; however, these findings were not observed for 180-day mortality (Fig. 1). Methylprednisolone was associated with a significantly increased risk of 180-day mortality. Among patients with non-viral ARDS, corticosteroid use (regardless of dosage) for  $\geq 3$  days and dexamethasone use were significantly associated with decreased 30- and 180-day mortality (Fig. 1). Hydrocortisone use was associated with a significantly increased risk of 180-day mortality. In COVID-19 ARDS, corticosteroid use (regardless of dosage and duration), dexamethasone use, and methylprednisolone use were significantly associated with decreased 30-day mortality but not with decreased 180-day mortality (Fig. 1). A cumulative steroid dose  $\geq 250$  mg, steroid use for  $\geq 3$  days, hydrocortisone use, and methylprednisolone use were associated with a significantly increased risk of 180-day mortality. These observations did not change substantially when the analyses were stratified according to corticosteroid use for  $< 6$  days vs  $\geq 6$  days (eFig. 3).

### *Subgroup analyses*

In H1N1 ARDS, corticosteroid use was associated with a significantly lower risk of 30-day mortality in older patients ( $\geq 65$  years) with less organ dysfunction ( $< 3$ ); however, these findings were not observed for 180-day mortality (eFig. 4). A significantly increased risk of 180-day mortality was observed in younger patients ( $< 65$  years). No significant interaction was

observed with any variable among patients with non-viral ARDS (eFig. 5). In COVID-19 ARDS, the associations between corticosteroid use and 30-day mortality were not influenced when the patients were stratified according to any variable (eFig. 6). However, corticosteroid use was significantly associated with increased 180-day mortality in patients with less organ dysfunction and immunosuppression.

## **eDiscussion**

The present study revealed three main findings. First, corticosteroid use was protective for 30- and 180-day mortality in non-viral ARDS. However, corticosteroid use was only protective for 30-day mortality in viral ARDS. Furthermore, long-term corticosteroids were associated with increased 180-day mortality among patients with COVID-19 ARDS. Second, dexamethasone was associated with decreased 30- and 180-day mortality in viral and non-viral ARDS. Third, there was an increased risk of 180-day mortality with corticosteroid use among patients with COVID-19 ARDS who had less organ dysfunction and immunosuppression.

Corticosteroid use was associated with decreased 30-day mortality among patients with H1N1 ARDS. This might be explained by the findings that relatively low-dose steroids (approximately 60 mg/day of methylprednisolone equivalents) were administered, and all patients were mechanically ventilated. Previous reports showed that low-to-moderate-dose corticosteroids reduced mortality among severe H1N1 patients with a  $\text{PaO}_2/\text{FiO}_2 < 300$  mmHg [9]. Notably, corticosteroids were associated with both decreased 30- and 180-day mortality in non-viral ARDS but were not associated with decreased 180-day mortality in H1N1 or COVID-19 ARDS. The differences in complications from corticosteroid use, such as nosocomial infection and muscle weakness, between viral and non-viral ARDS might influence long-term morbidity and mortality. Additional studies are required to address this issue.

The optimal dosage of steroid therapy in ARDS remains unknown. The present results showed that corticosteroids were generally associated with decreased 30-day mortality among all patients with ARDS, regardless of dosage. These findings are in accordance with those of a recent meta-analysis suggesting that the effect of corticosteroids on mortality in ARDS appears to be consistent between different dosages [10].

Dexamethasone was associated with decreased 30-day mortality among all patients with ARDS, and the survival benefits continued with a follow-up duration of 180 days. Dexamethasone has the highest binding affinity to the glucocorticoid receptor [11]. In addition, the effective dose and half-life of dexamethasone are higher than those of other corticosteroids [12]. Moreover, multicenter randomized trials have used dexamethasone to reduce the duration of mechanical ventilation and mortality in COVID-19 and non-COVID-19 ARDS [7, 8]. Conversely, methylprednisolone was associated with increased 180-day mortality in H1N1 or



COVID-19 ARDS. These findings may be unexpected given the higher lung penetration of methylprednisolone than dexamethasone [13]. Further studies are needed to explore the long-term safety of methylprednisolone for ARDS.

Corticosteroids may be beneficial or harmful in certain ARDS phenotypes. In H1N1 ARDS, corticosteroid use was associated with a decreased risk of 30-day mortality in patients with older age but was associated with an increased risk of 180-day mortality in younger age. In COVID-19 ARDS, corticosteroid use was associated with increased 180-day mortality in patients with less organ dysfunction. Consistent findings were observed in the Metcovid trial, which found a significantly lower 28-day mortality in older patients (>60 years) with COVID-19 with higher C-reactive protein levels who received methylprednisolone [14]. In addition, a recent study of critically ill patients with COVID-19 showed that corticosteroids were associated with decreased 90-day mortality in those with more severe illness [15]. Taken together, these findings suggest that corticosteroids might benefit patients who are elderly or have a more severe inflammatory response.

To the best of our knowledge, the current study is one of the few epidemiologic studies to evaluate whether corticosteroid use was associated with mortality in a nationwide cohort of ARDS due to different etiologies. The main strength of study is the long-term (180 days) data from a substantial number of patients with comparison groups. Various subgroup analyses were also performed to identify ARDS phenotypes more likely to benefit from corticosteroids. Controversies exist between the findings of previous studies and the present results regarding the use of corticosteroids, especially methylprednisolone, and increased long-term mortality in COVID-19 ARDS. However, it should be noted that most previous studies that showed a survival benefit limited follow-up to 28 days.

This study has several limitations. First, its retrospective nature cannot exclude the likelihood of residual confounding and precludes causal inference on association between corticosteroid use and mortality. Second, the accuracy of diagnostic codes for ARDS may be limited by the possibility of over- or undercoding. For H1N1 or COVID-19 ARDS, it was not feasible to include patients who met the Berlin definition [16] because chest imaging and oxygenation data were lacking. However, the current study only included patients who received mechanical ventilation, and viral infections with severe respiratory failure usually present with

bilateral infiltrates [17]. Third, vital signs and laboratory data were also lacking, but diagnoses, prescriptions, and procedures served as surrogates for ARDS severity. Logistic regression model for mortality included organ dysfunction and ECMO as covariates. However, adjusting for these variables may induce a risk of overcorrection on factors which could be intermediates between the exposure and the outcome [18]. Fourth, data on the timing of corticosteroid initiation were unavailable due to lack of time stamps. Thus, whether early or late treatment is associated with outcomes could not be assessed. Patients who died or were discharged within two days of hospitalization were excluded to minimize immortal time bias. Fifth, the standard of care in ARDS, such as ventilation parameters and rescue therapies, may have changed between 2009 and 2020, and these may have biased the results. Sixth, important patient outcomes other than mortality, including health-related quality of life and functional/cognitive/neurologic outcomes, were not studied.

## References

1. National Health Insurance Service (2018) Population coverage. <https://www.nhis.or.kr/english/wbheaa02400m01.do>. Accessed 17 August 2022
2. Palese P, Wang TT (2011) Why do influenza virus subtypes die out? A hypothesis. *mBio* 2:e00150–11
3. Corman VM, Landt O, Kaiser M et al (2020) Detection of 2019 novel coronavirus (2019-nCoV) by real-time RT-PCR. *Euro Surveill* 25:2000045
4. Meikle AW, Tyler FH (1977) Potency and duration of action of glucocorticoids. Effects of hydrocortisone, prednisone and dexamethasone on human pituitary-adrenal function. *Am J Med* 63:200–207
5. Charlson ME, Pompei P, Ales KL, MacKenzie CR (1987) A new method of classifying prognostic comorbidity in longitudinal studies: development and validation. *J Chronic Dis* 40:373–383
6. Perkins NJ, Schisterman EF (2006) The inconsistency of "optimal" cutpoints obtained using two criteria based on the receiver operating characteristic curve. *Am J Epidemiol* 163:670–675
7. Villar J, Ferrando C, Martínez D et al (2020) Dexamethasone treatment for the acute respiratory distress syndrome: a multicentre, randomised controlled trial. *Lancet Respir Med* 8:267–276
8. RECOVERY Collaborative Group, Horby P, Lim WS et al (2021) Dexamethasone in hospitalized patients with Covid-19. *N Engl J Med* 384:693–704
9. Li H, Yang SG, Gu L et al (2017) Effect of low-to-moderate-dose corticosteroids on mortality of hospitalized adolescents and adults with influenza A(H1N1)pdm09 viral pneumonia. *Influenza Other Respir Viruses* 11:345–354
10. Chaudhuri D, Sasaki K, Karkar A et al (2021) Corticosteroids in COVID-19 and non-COVID-19 ARDS: a systematic review and meta-analysis. *Intensive Care Med* 47:521–537
11. Derendorf H, Mollmann H, Hochhaus G, Meibohm B, Barth J (1997) Clinical PK/PD modelling as a tool in drug development of corticosteroids. *Int J Clin Pharmacol Ther* 35:481–488
12. National Institute of Health (2022) COVID-19 treatment guidelines - corticosteroids. <https://www.covid19treatmentguidelines.nih.gov/therapies/immunomodulators/corticosteroids/>. Accessed 17 August 2022
13. Braude AC, Rebeck AS (1983) Prednisone and methylprednisolone disposition in the lung. *Lancet* 2:995–997
14. Jeronimo CMP, Farias MEL, Val FFA et al (2021) Methylprednisolone as adjunctive therapy for patients hospitalized with coronavirus disease 2019 (COVID-19; Metcovid): a randomized, double-blind, phase IIb, placebo-controlled trial. *Clin Infect Dis* 72:e373–e381
15. Torres A, Motos A, Cillóniz C et al (2022) Major candidate variables to guide personalised treatment with steroids in critically ill patients with COVID-19: CIBERESUCICOVID study.

Intensive Care Med 48:850–864

16. ARDS Definition Task Force, Ranieri VM, Rubenfeld GD et al (2012) Acute respiratory distress syndrome: the Berlin definition. *JAMA* 307:2526–2533

17. Bos LDJ, Brodie D, Calfee CS (2021) Severe COVID-19 infections-knowledge gained and remaining questions. *JAMA Intern Med* 181:9–11

18. Mansournia MA, Hernan MA, Greenland S (2013) Matched designs and causal diagrams. *Int J Epidemiol* 42:860–869

## eAppendix 1 Types and codes for intravenous corticosteroids

| Variable                                   | ATC codes | HIRA charge codes |
|--------------------------------------------|-----------|-------------------|
| <b>Dexamethasone</b>                       |           |                   |
| Dexamethasone palmitate 4 mg               | H02AB02   | 142001BIJ         |
| Dexamethasone palmitate 4 mg               | H02AB02   | 142030BIJ         |
| Dexamethasone sodium phosphate 5 mg        | H02AB02   | 142201BIJ         |
| Dexamethasone sodium phosphate 4.37 mg     | H02AB02   | 142202BIJ         |
| Dexamethasone disodium phosphate 4.37 mg   | H02AB02   | 142230BIJ         |
| Dexamethasone disodium phosphate 5 mg      | H02AB02   | 142232BIJ         |
| Dexamethasone disodium phosphate 20 mg     | H02AB02   | 142233BIJ         |
| <b>Hydrocortisone</b>                      |           |                   |
| Hydrocortisone sodium succinate 100 mg     | H02AB09   | 171201BIJ         |
| Hydrocortisone sodium succinate 250 mg     | H02AB09   | 171202BIJ         |
| <b>Methylprednisolone</b>                  |           |                   |
| Methylprednisolone acetate 200 mg          | H02AB04   | 193501BIJ         |
| Methylprednisolone acetate 40 mg           | H02AB04   | 193502BIJ         |
| Methylprednisolone acetate 40 mg           | H02AB04   | 193530BIJ         |
| Methylprednisolone acetate 200 mg          | H02AB04   | 193531BIJ         |
| Methylprednisolone sodium succinate 125 mg | H02AB04   | 193601BIJ         |
| Methylprednisolone sodium succinate 250 mg | H02AB04   | 193602BIJ         |
| Methylprednisolone sodium succinate 40 mg  | H02AB04   | 193603BIJ         |
| Methylprednisolone sodium succinate 500 mg | H02AB04   | 193604BIJ         |

ATC Anatomic Therapeutic Chemical; HIRA Health Insurance Review and Assessment Service

## eAppendix 2 Comorbidities based on the Charlson Comorbidity Index<sup>a</sup>

| Variable                           | ICD-10 codes                                                                                                                                                                                                                                                                                                                                                                                                                  |
|------------------------------------|-------------------------------------------------------------------------------------------------------------------------------------------------------------------------------------------------------------------------------------------------------------------------------------------------------------------------------------------------------------------------------------------------------------------------------|
| <b>Charlson Comorbidity Index</b>  |                                                                                                                                                                                                                                                                                                                                                                                                                               |
| Myocardial infarction              | I21, I22, I252                                                                                                                                                                                                                                                                                                                                                                                                                |
| Congestive heart failure           | I099, I110, I130, I132, I255, I420, I425, I426, I427, I428, I429, I43, I50, P290                                                                                                                                                                                                                                                                                                                                              |
| Peripheral vascular disease        | I70, I71, I731, I738, I739, I771, I790, I792, K551, K558, K559, Z958, Z959                                                                                                                                                                                                                                                                                                                                                    |
| Cerebrovascular disease            | G45, G46, I60, I61, I62, I63, I64, I65, I66, I67, I68, I69, H340                                                                                                                                                                                                                                                                                                                                                              |
| Dementia                           | F00, F01, F02, F03, G30, F051, G311                                                                                                                                                                                                                                                                                                                                                                                           |
| Chronic pulmonary disease          | I278, I279, J40, J41, J42, J43, J44, J45, J46, J47, J60, J61, J62, J63, J64, J65, J66, J67, J684, J701, J703                                                                                                                                                                                                                                                                                                                  |
| Rheumatic disease                  | M05, M06, M315, M32, M33, M34, M351, M353, M360                                                                                                                                                                                                                                                                                                                                                                               |
| Peptic ulcer disease               | K25, K26, K27, K28                                                                                                                                                                                                                                                                                                                                                                                                            |
| Mild liver disease                 | B18, K700, K701, K702, K703, K709, K713, K714, K715, K717, K73, K74, K760, K762, K763, K764, K768, K769, Z944                                                                                                                                                                                                                                                                                                                 |
| Moderate or severe liver disease   | I850, I859, I864, I982, K704, K711, K721, K729, K765, K766, K767                                                                                                                                                                                                                                                                                                                                                              |
| Diabetes without complications     | E100, E101, E106, E108, E109, E110, E111, E116, E118, E119, E120, E121, E126, E128, E129, E130, E131, E136, E138, E139, E140, E141, E146, E148, E149                                                                                                                                                                                                                                                                          |
| Diabetes with complications        | E102, E103, E104, E105, E107, E112, E113, E114, E115, E117, E122, E123, E124, E125, E127, E132, E133, E134, E135, E137, E142, E143, E144, E145, E147                                                                                                                                                                                                                                                                          |
| Paraplegia and hemiplegia          | G041, G114, G800, G81, G82, G830, G831, G832, G833, G834, G839                                                                                                                                                                                                                                                                                                                                                                |
| Renal disease                      | I120, I131, N030, N031, N032, N033, N034, N035, N036, N037, N038, N039, N050, N051, N052, N053, N054, N055, N056, N057, N058, N059, N18, N19, N250, Z490, Z491, Z492, Z940, Z992                                                                                                                                                                                                                                              |
| Any malignancy                     | C00, C01, C02, C03, C04, C05, C06, C07, C08, C09, C10, C11, C12, C13, C14, C15, C16, C17, C18, C19, C20, C21, C22, C23, C24, C25, C26, C30, C31, C32, C33, C34, C37, C38, C39, C40, C41, C43, C45, C46, C47, C48, C49, C50, C51, C52, C53, C54, C55, C56, C57, C58, C60, C61, C62, C63, C64, C65, C66, C67, C68, C69, C70, C71, C72, C73, C74, C75, C76, C81, C82, C83, C84, C85, C88, C90, C91, C92, C93, C94, C95, C96, C97 |
| Metastatic solid tumor             | C77, C78, C79, C80                                                                                                                                                                                                                                                                                                                                                                                                            |
| AIDS/HIV                           | B20, B21, B22, B24                                                                                                                                                                                                                                                                                                                                                                                                            |
| <b>Hypertension, uncomplicated</b> | I10                                                                                                                                                                                                                                                                                                                                                                                                                           |
| <b>Hypertension, complicated</b>   | I11, I12, I13, I15                                                                                                                                                                                                                                                                                                                                                                                                            |

*AIDS* acquired immune deficiency syndrome; *HIV* human immunodeficiency virus; *ICD* International Classification of Diseases

<sup>a</sup> Hypertension is included as a Charlson comorbidity and was identified separately using the ICD-10 codes

**eAppendix 3** Hospital types defined by Korean Health Law according to the number of beds and specialties

Public health center

General practitioner

Hospital: healthcare institution with >30 inpatient beds

General hospital: hospital with >100 beds and >7 specialty departments for internal medicine, surgery, pediatrics, obstetrics and gynecology, anesthesiology, pathology, and laboratory medicine

Tertiary hospital: general hospital with >20 specialty departments that serves as a teaching hospital for medical students and nurses

## eAppendix 4 ICD-10-based classification of organ dysfunction

| Variable                                                                           | Codes |
|------------------------------------------------------------------------------------|-------|
| <b>Cardiovascular</b>                                                              |       |
| Septic shock                                                                       | R572  |
| Hypotension                                                                        | I95   |
| Other hypotension                                                                  | I958  |
| Hypotension, unspecified                                                           | I959  |
| Shock, NEC                                                                         | R57   |
| Other shock                                                                        | R578  |
| Shock, unspecified                                                                 | R579  |
| Shock (endotoxic, hypovolemic) during or following a procedure                     | T811  |
| Use of a vasopressor (norepinephrine, epinephrine, vasopressin, dopamine)          |       |
| <b>Respiratory</b>                                                                 |       |
| Adult respiratory distress syndrome                                                | J80   |
| Pulmonary edema                                                                    | J81   |
| Respiratory failure, NEC                                                           | J96   |
| Acute respiratory failure                                                          | J960  |
| Respiratory failure, unspecified                                                   | J969  |
| Hypoxemia                                                                          | R0902 |
| Cyanosis                                                                           | R230  |
| Dependence on respirator                                                           | Z991  |
| Conventional oxygen therapy, high-flow nasal cannula, mechanical ventilation       |       |
| <b>Neurologic</b>                                                                  |       |
| Delirium not induced by alcohol and other psychoactive substances                  | F05   |
| Other mental disorders due to brain damage and dysfunction and to physical disease | F06   |
| Organic psychosis NOS                                                              | F09   |
| Anoxic brain damage, NEC                                                           | G931  |
| Encephalopathy, unspecified                                                        | G934  |
| Metabolic encephalopathy                                                           | G9380 |
| Somnolence, stupor and coma                                                        | R40   |
| Somnolence                                                                         | R400  |
| Stupor                                                                             | R401  |
| Disorientation, unspecified                                                        | R410  |
| <b>Hematologic</b>                                                                 |       |
| Disseminated intravascular coagulation (defibrination syndrome)                    | D65   |
| Other coagulation defects                                                          | D68   |
| Other specified coagulation defects                                                | D688  |
| Coagulation defect, unspecified                                                    | D689  |
| Purpura and other hemorrhagic conditions                                           | D69   |
| Secondary thrombocytopenia                                                         | D695  |
| Thrombocytopenia, unspecified                                                      | D696  |
| Spontaneous ecchymoses                                                             | R233  |
| Abnormal coagulation lab                                                           | R791  |
| <b>Hepatic</b>                                                                     |       |
| Hepatic failure, NEC                                                               | K72   |
| Central hemorrhagic necrosis of liver                                              | K762  |
| Infarction of liver                                                                | K763  |
| Unspecified jaundice                                                               | R17   |
| <b>Renal</b>                                                                       |       |
| Acute renal failure                                                                | N17   |
| Unspecified renal failure                                                          | N19   |
| Postprocedural renal failure                                                       | N990  |
| Anuria and oliguria                                                                | R34   |
| Abnormal results of kidney function studies                                        | R944  |



| Variable                     | Codes |
|------------------------------|-------|
| Dependence on renal dialysis | Z992  |
| Renal replacement therapy    |       |
| <b>Metabolic</b>             |       |
| Acidosis                     | E872  |

*ICD* International Classification of Diseases; *NEC* not elsewhere classified; *NOS* not otherwise specified

**eTable 1** Baseline patient characteristics in H1N1, non-viral, or COVID-19 ARDS

| Characteristics                                | H1N1<br>(n = 3461) | Non-viral<br>(n = 6862) | COVID-19<br>(n = 7783) | p value |
|------------------------------------------------|--------------------|-------------------------|------------------------|---------|
| Age, mean (SD), y                              | 64.6 (15.1)        | 67.8 (14.5)             | 68.4 (14.5)            | <0.001  |
| Sex, No. (%)                                   |                    |                         |                        | 0.03    |
| Male                                           | 2148 (62)          | 4418 (64)               | 4878 (63)              |         |
| Female                                         | 1313 (38)          | 2444 (36)               | 2905 (37)              |         |
| Comorbidities, No. (%)                         |                    |                         |                        |         |
| Diabetes                                       | 1543 (45)          | 2887 (42)               | 3609 (46)              | <0.001  |
| Hypertension                                   | 2095 (61)          | 4243 (62)               | 5308 (68)              | <0.001  |
| Myocardial infarction                          | 230 (7)            | 320 (5)                 | 483 (6)                | <0.001  |
| Congestive heart failure                       | 559 (16)           | 1376 (20)               | 2145 (28)              | <0.001  |
| Cerebrovascular disease                        | 1041 (30)          | 1868 (27)               | 2388 (31)              | <0.001  |
| Chronic pulmonary disease                      | 1837 (53)          | 3700 (54)               | 3974 (51)              | 0.002   |
| Chronic liver disease                          | 1093 (32)          | 2725 (40)               | 3145 (40)              | <0.001  |
| Chronic kidney disease                         | 358 (10)           | 713 (10)                | 1286 (17)              | <0.001  |
| Malignancy                                     | 708 (20)           | 1718 (25)               | 1883 (24)              | <0.001  |
| Charlson Comorbidity Index, mean (SD)          | 3.1 (2.9)          | 3.2 (2.9)               | 3.6 (3.1)              | <0.001  |
| Immunosuppression, No. (%) <sup>a</sup>        | 1462 (42)          | 3382 (49)               | 3509 (45)              | <0.001  |
| Previous steroid use, No. (%) <sup>b</sup>     | 1939 (56)          | 4195 (61)               | 4512 (58)              | <0.001  |
| Organ dysfunction, No. (%)                     |                    |                         |                        |         |
| Cardiovascular                                 | 2705 (78)          | 6341 (92)               | 6667 (86)              | <0.001  |
| Respiratory                                    | 3461 (100)         | 6862 (100)              | 7783 (100)             | <0.001  |
| Neurologic                                     | 223 (6)            | 322 (5)                 | 397 (5)                | <0.001  |
| Hematologic                                    | 668 (19)           | 1687 (25)               | 1062 (14)              | <0.001  |
| Hepatic                                        | 9 (0.3)            | 79 (1)                  | 25 (0.3)               | <0.001  |
| Renal                                          | 427 (12)           | 2002 (29)               | 1650 (21)              | <0.001  |
| Metabolic                                      | 138 (4)            | 567 (8)                 | 357 (5)                | <0.001  |
| No. of organ dysfunctions, No. (%)             |                    |                         |                        |         |
| 1                                              | 596 (17)           | 396 (6)                 | 904 (12)               | <0.001  |
| 2                                              | 1852 (54)          | 3248 (47)               | 4318 (55)              | <0.001  |
| 3                                              | 758 (22)           | 2128 (31)               | 1925 (25)              | <0.001  |
| ≥4                                             | 255 (7)            | 1090 (16)               | 636 (8)                | <0.001  |
| Corticosteroids, No. (%)                       | 1969 (57)          | 5171 (75)               | 4866 (63)              | <0.001  |
| Dexamethasone                                  | 623 (32)           | 1883 (36)               | 1817 (37)              | <0.001  |
| Hydrocortisone                                 | 445 (23)           | 906 (18)                | 1153 (24)              | <0.001  |
| Methylprednisolone                             | 901 (46)           | 2382 (46)               | 1896 (39)              | <0.001  |
| Cumulative dose, median (IQR), mg <sup>c</sup> | 125 (40–396)       | 180 (60–570)            | 125 (40–400)           | <0.001  |
| Total days of use, median (IQR)                | 2 (1–4)            | 3 (1–7)                 | 2 (1–5)                | <0.001  |
| Neuromuscular blocking agents, No. (%)         | 1472 (43)          | 4262 (62)               | 4410 (57)              | <0.001  |
| Total days of use, median (IQR)                | 1 (1–2)            | 1 (1–2)                 | 1 (1–1)                | <0.001  |
| Vasopressor use, No. (%)                       | 2696 (78)          | 6292 (92)               | 6610 (85)              | <0.001  |
| Renal replacement therapy, No. (%)             | 383 (11)           | 1778 (26)               | 1516 (19)              | <0.001  |
| ECMO, No. (%)                                  | 16 (0.5)           | 126 (1.9)               | 50 (0.6)               | <0.001  |

ARDS acute respiratory distress syndrome; COVID-19 coronavirus disease 2019; ECMO extracorporeal membrane oxygenation; H1N1 2009 influenza A

<sup>a</sup> Immunosuppression includes malignancies, human immunodeficiency virus infection, organ transplantation, or administration of immunosuppressive therapy

<sup>b</sup> Defined by oral or intravenous for ≥30 days during the previous year

<sup>c</sup> Total cumulative dose was calculated as the sum of methylprednisolone doses and converted doses of dexamethasone and hydrocortisone

**eTable 2** Primary and secondary outcomes

| Outcomes                           | H1N1<br>(n = 3461)    | Non-viral<br>(n = 6862) | COVID-19<br>(n = 7783) | p value |
|------------------------------------|-----------------------|-------------------------|------------------------|---------|
| <b>Primary outcomes</b>            |                       |                         |                        |         |
| 30-day mortality, No. (%)          | 1019 (29.4)           | 3035 (44.2)             | 2181 (28.0)            | <0.001  |
| 180-day mortality, No. (%)         | 1821 (52.6)           | 4614 (67.2)             | 3828 (49.2)            | <0.001  |
| <b>Secondary outcomes</b>          |                       |                         |                        |         |
| Vasopressor days, median (IQR)     | 1 (1–3)<br>[n = 2696] | 2 (1–3)<br>[n = 6292]   | 1 (1–3)<br>[n = 6610]  | <0.001  |
| Ventilator days, median (IQR)      | 2 (1–8)               | 5 (1–13)                | 2 (1–6)                | <0.001  |
| Length of stay, median (IQR), days |                       |                         |                        |         |
| ICU                                | 8 (3–15)              | 11 (4–21)               | 6 (2–15)               | <0.001  |
| Hospital                           | 29 (14–61)            | 39 (17–614)             | 29 (14–77)             | <0.001  |
| Tracheostomy, No. (%)              | 580 (17)              | 1584 (23)               | 1343 (17)              | <0.001  |

ARDS acute respiratory distress syndrome; COVID-19 coronavirus disease 2019; H1N1 2009 influenza A; ICU intensive care unit

**eFig. 1** Patient inclusion flowchart in the nationwide cohort study of H1N1, non-viral, and COVID-19 ARDS

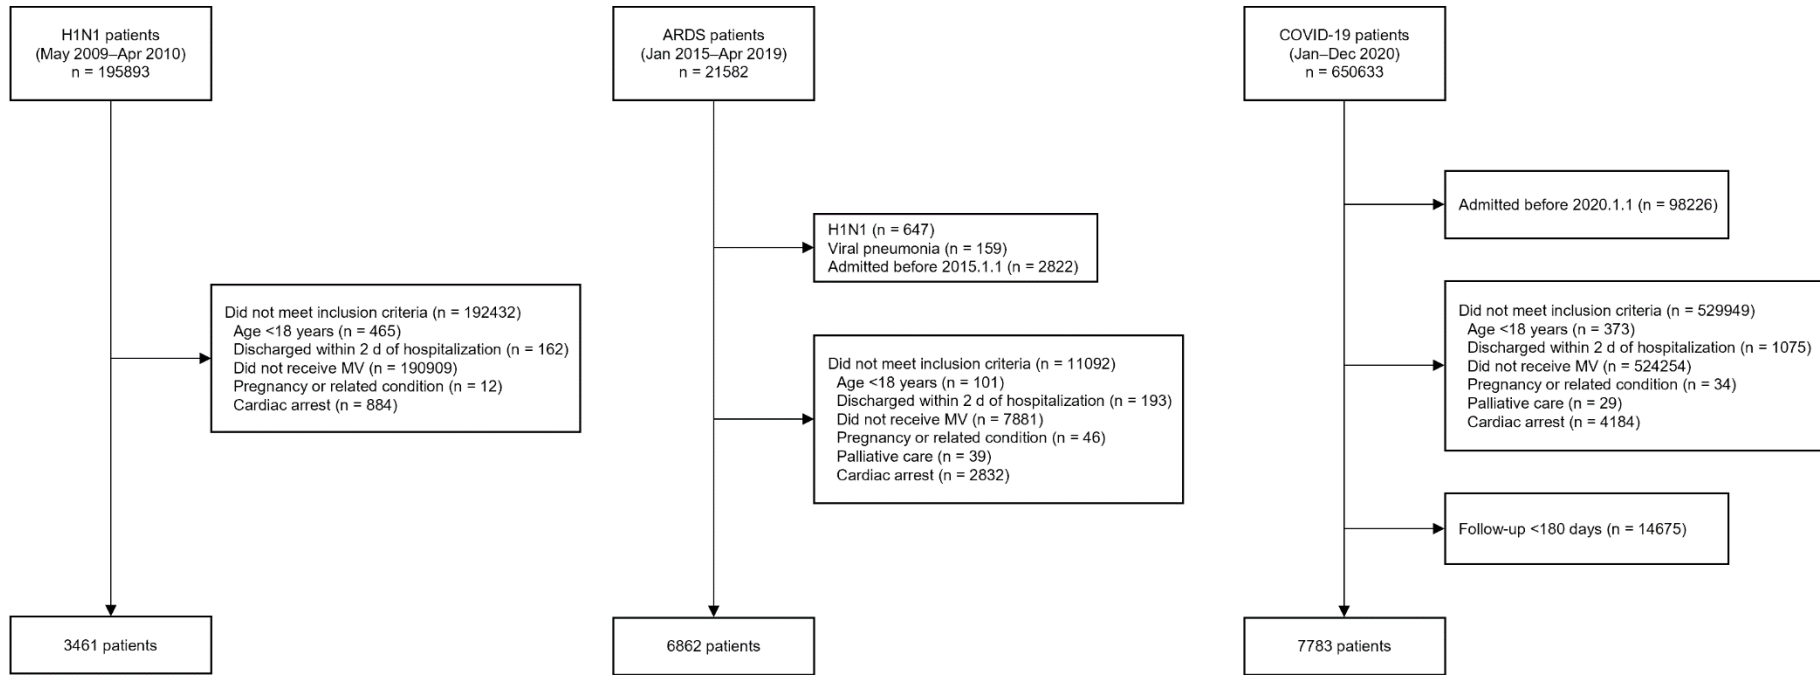

ARDS acute respiratory distress syndrome; COVID-19 coronavirus disease 2019; H1N1 2009 influenza A; MV mechanical ventilation

**eFig. 2** Survival from hospital admission to day 180

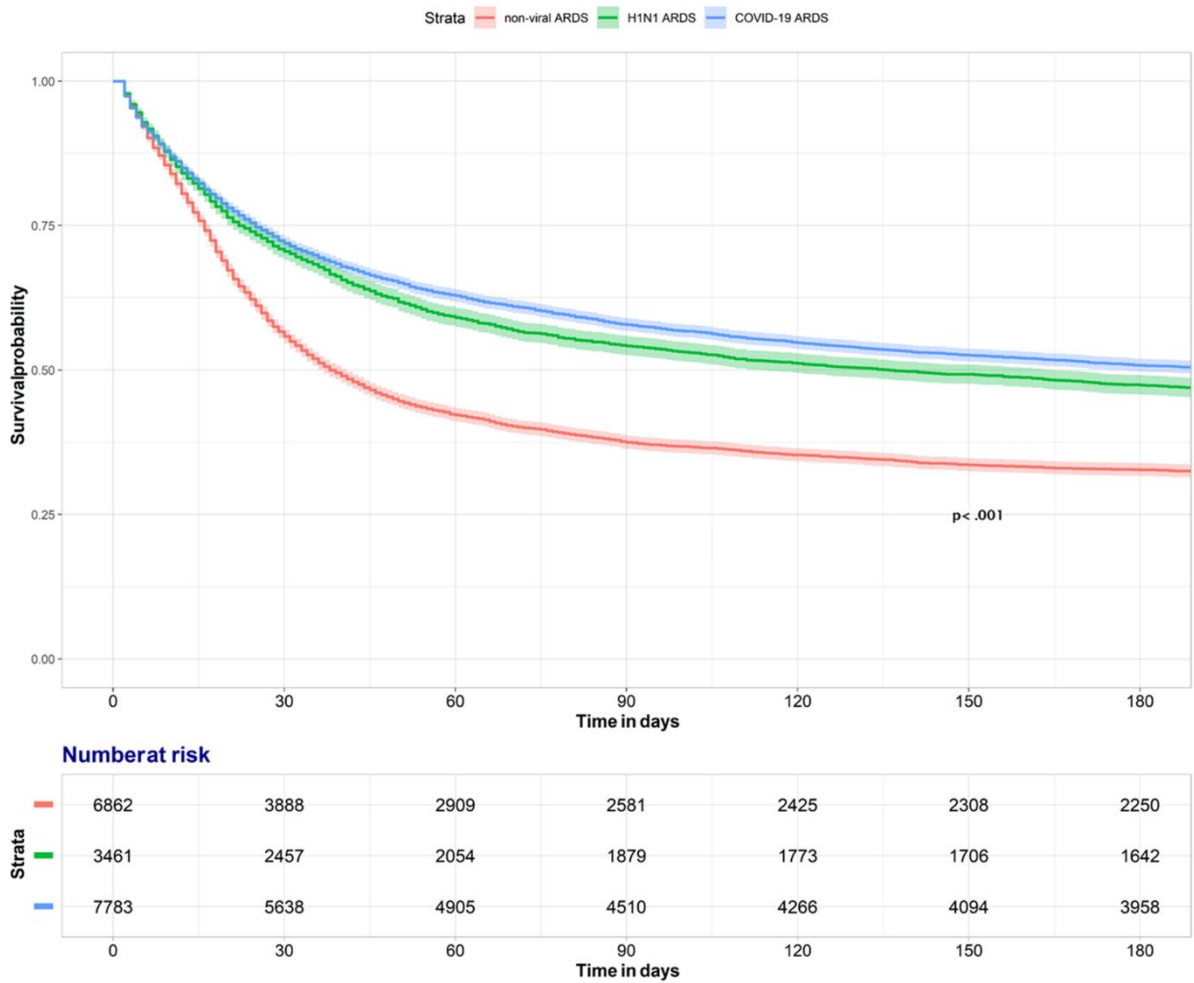

The median (interquartile range) time to death was 61 (17–488) days in H1N1 ARDS, 26 (12–65) days in non-viral ARDS, and 27 (10–72) days in COVID-19 ARDS

ARDS acute respiratory distress syndrome; COVID-19 coronavirus disease 2019; H1N1 2009 influenza A

**eFig. 3** Associations between corticosteroid use and **(A)** 30- and **(B)** 180-day mortality according to the duration of use (<6 days vs ≥6 days) in H1N1, non-viral, or COVID-19 ARDS

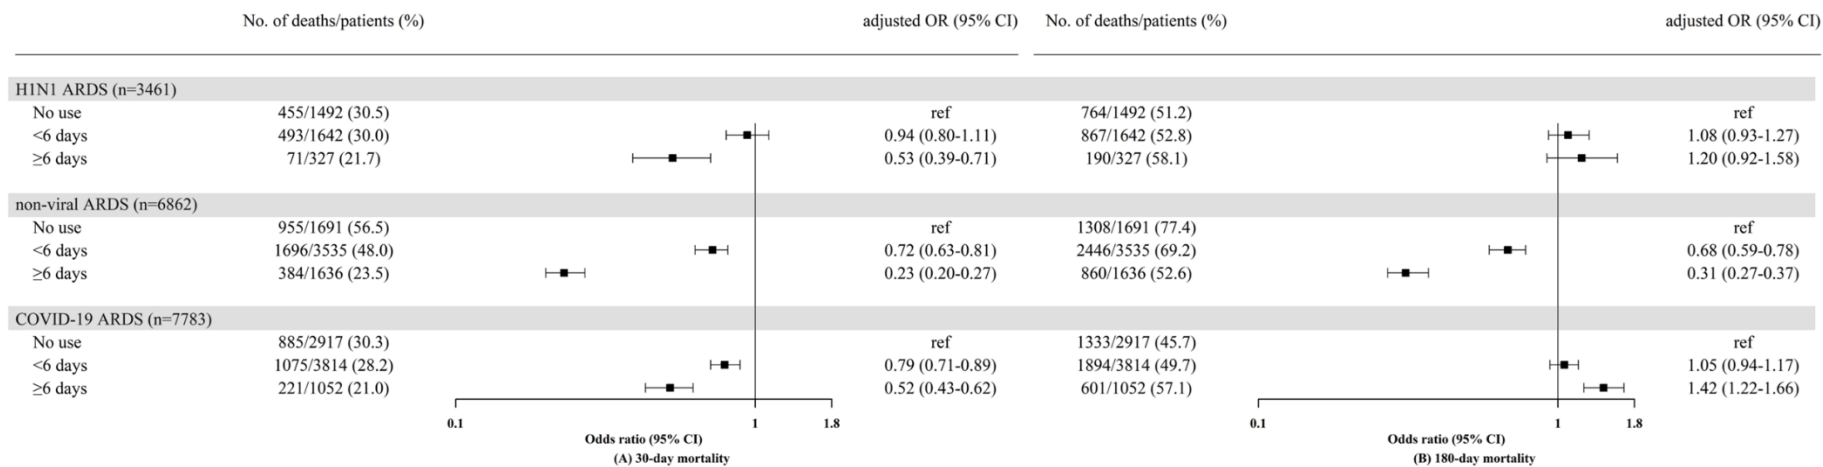

The numbers and percentages of patients who died according to each risk factor and the resulting odds ratios, adjusted for age, sex, Charlson Comorbidity Index, immunosuppression, hospital type, organ dysfunction, neuromuscular blocking agent use, and extracorporeal membrane oxygenation

ARDS acute respiratory distress syndrome; COVID-19 coronavirus disease 2019; H1N1 2009 influenza A

**eFig. 4** Associations between corticosteroid use and **(A)** 30- and **(B)** 180-day mortality according to subgroup in H1N1 ARDS

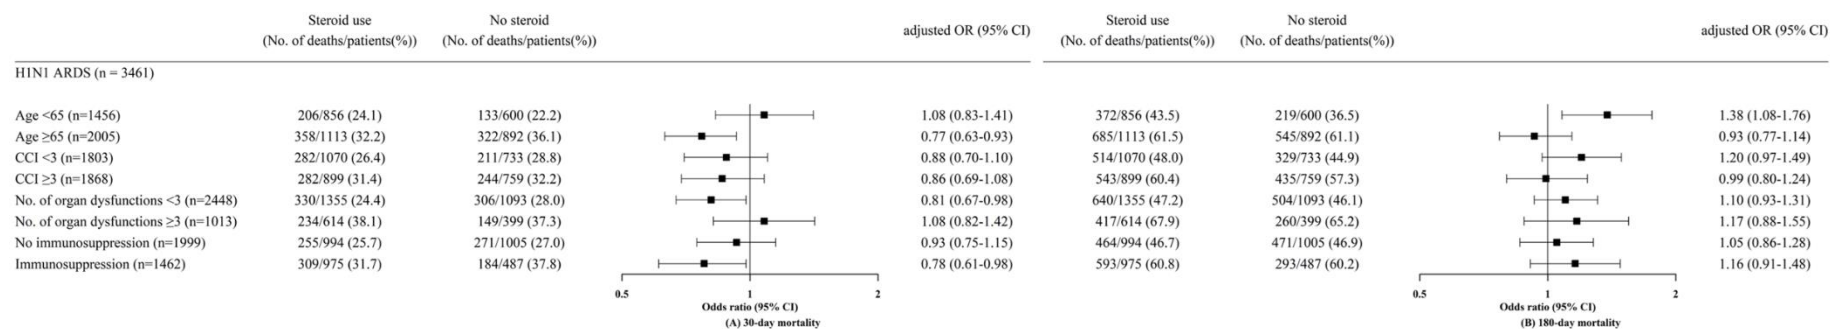

The numbers and percentages of patients who died according to each subgroup and the resulting odds ratios, adjusted for age, sex, Charlson Comorbidity Index, immunosuppression, hospital type, organ dysfunction, neuromuscular blocking agent use, and extracorporeal membrane oxygenation

ARDS acute respiratory distress syndrome; CCI Charlson Comorbidity Index; H1N1 2009 influenza A

**eFig. 5** Associations between corticosteroid use and **(A)** 30- and **(B)** 180-day mortality according to subgroup in non-viral ARDS

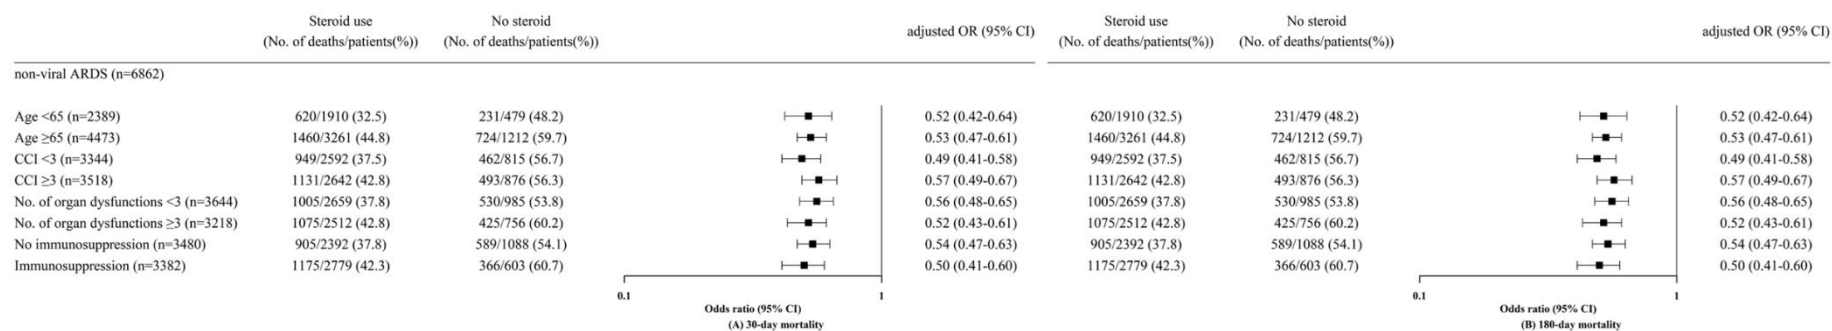

The numbers and percentages of patients who died according to each subgroup and the resulting odds ratios, adjusted for age, sex, Charlson Comorbidity Index, immunosuppression, hospital type, organ dysfunction, neuromuscular blocking agent use, and extracorporeal membrane oxygenation

ARDS acute respiratory distress syndrome; CCI Charlson Comorbidity Index



**eFig. 6** Associations between corticosteroid use and **(A)** 30- and **(B)** 180-day mortality according to subgroup in COVID-19 ARDS

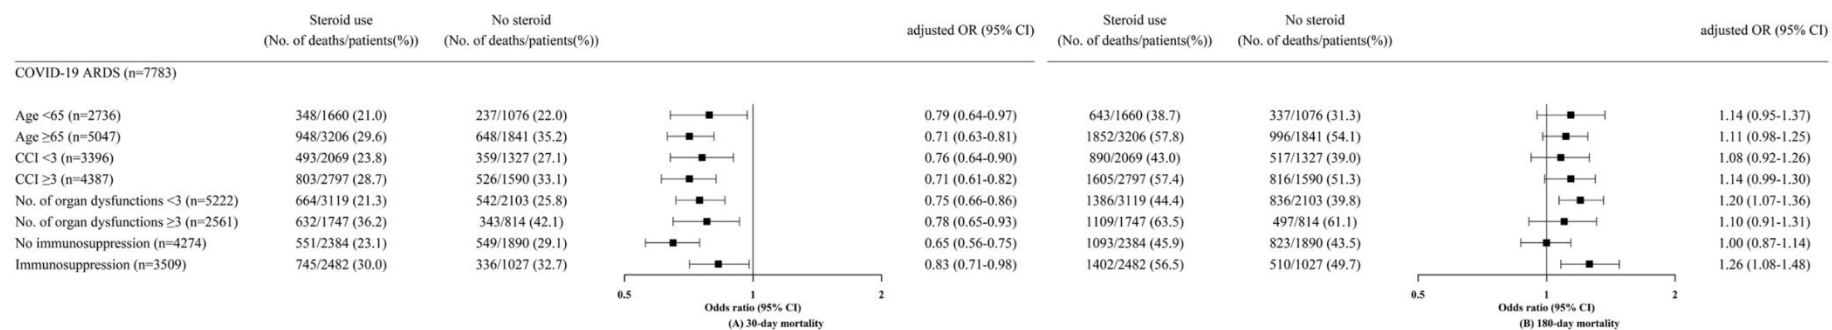

The numbers and percentages of patients who died according to each subgroup and the resulting odds ratios, adjusted for age, sex, Charlson Comorbidity Index, immunosuppression, hospital type, organ dysfunction, neuromuscular blocking agent use, and extracorporeal membrane oxygenation

ARDS acute respiratory distress syndrome; CCI Charlson Comorbidity Index; COVID-19 coronavirus disease 2019
